1 **Meta-analysis of orthogonal OMICs data from COVID-19 patients unveils**  
2 **prognostic markers and antiviral factors.**

3 Abhijith Biji<sup>1,2†</sup>, Shachee Swaraj<sup>2†</sup>, Oyahida Khatun<sup>2</sup>, Rohan Narayan<sup>2</sup>, Rahila Sardar<sup>3</sup>,  
4 Deepshikha Satish<sup>3</sup>, Simran Mehta<sup>4</sup>, Hima Bindhu<sup>4</sup>, Madhumol Jeevan<sup>4</sup>, Deepak K Saini<sup>5</sup>,  
5 Amit Singh<sup>2</sup>, Dinesh Gupta<sup>3</sup>, Shashank Tripathi<sup>2\*</sup>

6  
7 <sup>1</sup>Undergraduate Programme, Indian Institute of Science, Bengaluru, India

8 <sup>2</sup>Microbiology & Cell biology Department, Centre for Infectious Disease Research, Indian  
9 Institute of Science, Bengaluru, India

10 <sup>3</sup>Translational Bioinformatics Group, International Centre for Genetic Engineering and  
11 Biotechnology, New Delhi, India

12 <sup>4</sup>COVID-19 Diagnostic Facility, Centre for Infectious Disease Research, Indian Institute of  
13 Science, Bengaluru, India

14 <sup>5</sup>Molecular Reproduction & Developmental Genetics, Indian Institute of Science, Bengaluru,  
15 India

16

17 \*Correspondence: [shashankt@iisc.ac.in](mailto:shashankt@iisc.ac.in)

18 <sup>†</sup>These authors contributed equally to this manuscript

19

20

21 **ABSTRACT**

22 Coronavirus disease 2019 (COVID-19) pandemic has lasted more than a year since its first  
23 case in December 2019 and yet its social and economic burden continues to grow. While a  
24 tremendous amount of OMICs data has been generated from COVID-19 patient samples, the  
25 host antiviral response and markers of disease progression remain to be completely delineated.  
26 In this study, we have conducted a meta-analysis of published transcriptome and proteome  
27 profiles of the nasal swab and bronchioalveolar lavage fluid (BALF) samples of COVID-19  
28 patients to identify high confidence upregulated host factors. This was followed by rank  
29 ordering, shortlisting, and validation of overexpression of a set of host factors in a nasal  
30 swab/BALF samples from a cohort of COVID-19 positive/negative,  
31 symptomatic/asymptomatic individuals. This led to the identification of host antiviral response  
32 in the upper respiratory tract and potential prognostic markers. Notably, SEPRIN B3 and  
33 Thioredoxin were identified as potential antiviral factors. In addition, several S100 family

34 proteins were found to be upregulated in COVID-19 specific and disease severity dependent  
35 manner. Overall, this study provides novel insights into the host antiviral mechanisms and  
36 COVID-19 disease progression.

37

## 38 **KEYWORDS**

39 COVID-19, SARS-CoV-2, Transcriptomics, Proteomics, Overlap Analysis, Antiviral  
40 response, Prognostic marker

41

## 42 **INTRODUCTION**

43 COVID-19 pandemic has been reported in 221 countries with a total of 110,526,493 cases and  
44 2,442,986 deaths worldwide, as on February 18, 2021, 12:49 GMT  
45 (<https://www.worldometers.info/coronavirus/>). The causative virus SARS-CoV-2 is a member  
46 of the family *Coronaviridae* which contains a single-stranded positive-sense RNA genome that  
47 encodes ~27 proteins (1). The initial symptoms of infection are flu-like, including fever, dry  
48 cough, headache, muscle pain, and shortness of breath, which may resolve in 7-8 days in  
49 healthy individuals. The majority of infected individuals, especially young adults may remain  
50 asymptomatic, even with considerable viral load (2, 3). In severe cases, it may progress to  
51 Acute Respiratory Distress Syndrome (ARDS), multi-organ failure, and occasionally to death,  
52 especially in patients with immune-deficiency and comorbidities (4). An effective and timely  
53 IFN response is critical in resolving viral infections (5), however, SARS-COV-2 seems to have  
54 acquired multiple strategies to suppress host immune response and disrupt immune  
55 homeostasis (6). Severe cases of COVID-19 show extensive damage to lung tissues caused by  
56 a hyperactive proinflammatory response to the virus often termed as a cytokine storm. (7). The  
57 mechanisms underlying immune dysregulation brought about by the viral infection remain to  
58 be completely defined. Extensive efforts have been undertaken to understand the host response  
59 to viral infection using high throughput genomics and proteomics technologies. Several studies  
60 have explored serum diagnostic and prognostic markers by evaluating transcriptomic and  
61 proteomic changes in mild, severe and fatal cases of COVID-19 (8-11). Elevated levels of  
62 interleukins (IL6 and IL10), C-reactive proteins (CRP), MCP1, MIP1A, TNF $\alpha$ , procalcitonin  
63 (PCT), lactate dehydrogenase (LDH), ferritins, D-dimers and cardiac troponins in serum  
64 samples of COVID-19 patients are indicative of disease severity (8-13). Examination of host  
65 response at the primary site of infection in the upper respiratory tract, is crucial to understand  
66 viral pathogenesis. Various studies utilized the bronchoalveolar lavage and nasopharyngeal

67 swabs to characterize the changes in transcripts and proteins during infection to understand  
68 COVID-19 pathogenesis (14-19), which have highlighted significantly upregulated genes and  
69 biological pathways altered during infection. While proinflammatory cytokines, chemokines,  
70 enzymes in neutrophil mediated immunity and several IFN stimulated genes (ISGs) have  
71 consistently showed up in their analysis, an experimental validation and mechanistic studies  
72 are generally lacking (14-19). A detailed characterization of antiviral response in the upper  
73 respiratory tract of patients, its variation with age, sex and association with progression of  
74 disease severity remains to be accomplished.

75

76 The goal of our study was to identify genes that are upregulated during SARS-CoV-2 infection  
77 in the upper respiratory tract of patients and understand their role in viral infection and disease  
78 progression. For this, we surveyed the literature for OMICs data from COVID-19 positive  
79 patient's nasal swab and BALF samples and selected 4 transcriptomic and 3 proteomic datasets.  
80 We performed a hypergeometric distribution-based overlap analysis followed by cumulative  
81 fold change score-based prioritization to shortlist genes. This was followed by testing gene  
82 expression level in nasal swab/ BALF samples from a cohort of COVID positive, negative,  
83 symptomatic, and asymptomatic individuals, ranging from 30-60 years in age and of mixed  
84 gender. Quantitative PCR data analysis revealed upregulation of TXN, SERPINB3, S100A8,  
85 ASS1, S100A9, S100A6, S100P, DEFA3, and KRT6A in COVID-19 specific manner, whereas  
86 AGR2, LCN2, and BPIFB1 were identified to be associated with the severity of COVID-19  
87 symptoms. Overall, our analysis reveals a specific set of host genes that are upregulated in a  
88 COVID-19 specific manner and are indicative of disease severity. In addition, we have  
89 uncovered novel potential antiviral mechanisms that can be repurposed to mitigate viral  
90 replication and pathogenesis.

91

## 92 **MATERIALS AND METHODS:**

93

### 94 **Data collection and Processing:**

95 Transcriptomics and protein abundance data from COVID-19 patient's naso- and  
96 oropharyngeal swab, bronchoalveolar lavage fluid (BALF), and other respiratory specimens  
97 were chosen from PubMed, BioRxiv, and MedRxiv using different combinations of keywords  
98 like "COVID-19, SARS-CoV-2, Transcriptomics, Proteomics, BALF, swab". Studies dealing with gene  
99 expression profiles of SARS-CoV-2 infected non-human cell lines and tissues were not

100 considered. The SARS-CoV-2 and COVID-19 collections in the EMBL-EBI PRIDE  
101 proteomics database (20) were retrieved and used without any modification. In the NCBI GEO  
102 database (21) the following combination of terms was used to collect relevant datasets: ((covid-  
103 19 OR SARS-COV-2) AND gse [entry type]) AND "Homo sapiens"[porgn: \_txid9606]. The retrieved  
104 datasets were then filtered by their date of publication to collect the studies published between  
105 the 1<sup>st</sup> of January 2020 and the 15<sup>th</sup> of September 2020. The filtration of datasets was carried  
106 out using two parameters, fold-change, and its significance value. Genes and proteins with a  
107 fold-change value of  $\geq 1.5$  and q-value  $\leq 0.05$  were chosen for the overlap analysis. The raw  
108 p-value was used for filtering in cases where the adjusted p-value was not provided, albeit with  
109 a more stringent cut-off of  $\leq 0.01$ . The UniProt IDs in filtered protein abundance datasets were  
110 converted to their corresponding primary Gene Symbols using UniProt (22).

111

### 112 **Gene set overlap analysis:**

113 The GeneOverlap class of R package “GeneOverlap” (23) was used for testing whether two  
114 lists of genes are independent, which is represented as a contingency table, and then Fisher’s  
115 exact test was used to find the statistical significance. Genes with less than 0.01 overlap p-  
116 value were selected for further analysis. The number of background genes for proteome-  
117 proteome pairwise study and the transcriptome-proteome pairwise study was 25,000, i.e., the  
118 number of protein-coding genes in Hg19. For the transcriptome-transcriptome overlap study,  
119 the number of background genes was taken to be the union of the expressed genes in both the  
120 datasets considered.

121

### 122 **Gene Ontology, Interferome Analysis, Cellular and tissue localization analysis:**

123 Enriched GO terms were obtained by express analysis on Metascape (24) and plotted using  
124 ggplot2 (25). The database Interferome v2.01 (26) was queried using gene symbols for  
125 identifying interferon regulated genes (IRGs) in normal samples of the respiratory system from  
126 both in vitro and in vivo experiments in humans. For cellular localization, each gene was  
127 queried on UniProt annotation (27) and Human Protein Atlas ver20.0 (28) and then manually  
128 annotated. The single-cell expression data of transcripts was also obtained from Human Protein  
129 Atlas ver20.0 (Available from <http://www.proteinatlas.org/>). They were further filtered to  
130 obtain cells that are associated with the immune system or respiratory tract.

131

### 132 **Virus-Host protein-protein interaction network analysis:**

133 The interaction data for the selected 46 genes were retrieved from publicly available interaction  
134 datasets (29). The retrieved information was then used to generate a network map. Cytoscape  
135 v3.8.0 (30) was used to construct the interaction network for virus-host protein-protein  
136 interaction. STRING database within the Cytoscape store was used to query the proteins to  
137 elucidate the interactions between the proteins significantly altered during SARS-CoV-2  
138 infection. The resulting STRING interaction network (confidence  $\geq 0.999$  for all the proteins  
139 and confidence  $\geq 0.90$  for NAMPT; max number of interactors = 10) was merged with the virus-  
140 host PPI on Cytoscape.

141

#### 142 **Nasopharyngeal Swab Collection and RNA Isolation:**

143 Nasopharyngeal swabs were collected around Bengaluru Urban city and brought to COVID-  
144 19 Diagnostic Facility at the Indian Institute of Science in viral transport media (VTM). RNA  
145 from patients was isolated using kits recommended and provided by the Indian Council of  
146 Medical Research. Appropriate RNA samples and VTMs were curated and selected manually  
147 based on age, sex, and severity of the disease.

148

#### 149 **qRT-PCR based measurement of gene set expression:**

150 Equal amounts of RNA were converted into cDNA using Prime Script™ RT Reagent Kit with  
151 gDNA Eraser (Perfect Real Time) (RR047A, Takara-Bio) and then diluted with 80µl nuclease-  
152 free water. The gene expression study was conducted using PowerUp™ SYBR™ Green Master  
153 Mix (A25778, Applied Biosystems™) with 18srRNA as the internal control and appropriate  
154 primers for the genes (Supplementary Table 3).

155

#### 156 **Statistical analysis:**

157 All statistical analyses and overlaps were performed in the R statistical environment version  
158 4.0.3 via RStudio version 1.3.1093. All boxplots were made using the ggplot2 package in R  
159 (25) where the hinges of boxes represent the first and third quartiles. The whiskers of the  
160 boxplot extend to the value which is 1.5 times the distance between the first and third quartiles.  
161 Any data point that lies beyond it is plotted separately with a dot and is considered outliers.  
162 Each data point in the boxplot represents one of the triplicates in RT-qPCR for a particular  
163 gene in a particular patient sample. Heatmaps were generated using the R package  
164 ComplexHeatmap (31).

165

#### 166 **Ethics Statement:**

167 This study was conducted in compliance with institutional human ethics and biosafety  
168 guidelines, (IHEC No. 13-11092020; IBSC/IISc/ST/19/2019-20), following the Indian Council  
169 of Medical Research and Department of Biotechnology recommendations.

170

## 171 **Results:**

### 172 **Compilation of published transcriptomics and proteomics data from COVID-19 patient** 173 **samples and overlap analysis revealed 567 upregulated genes.**

174 Based on the selection criteria (materials and methods) four transcriptomics and three  
175 proteomics datasets were chosen and were carried down for the analysis as mentioned in the  
176 workflow (Figure 1A). All these studies identified differentially expressed genes in infected  
177 patients with healthy individuals as control (Table S1). The filtration of data was carried out to  
178 sort only significantly upregulated genes from all the datasets (Table S2). Pairwise overlap  
179 analysis was performed on the filtered genes/proteins from each study by calculating the  
180 Jaccard score and significantly overlapping genes (p-value < 0.01) between T1-T3 (14), T1-T4  
181 (9), T1-P3 (2), T3-T4 (504), T3-P1 (10), T3-P2 (8), T3-P3 (17), T4-P1 (8), T4-P3 (15) and P1-  
182 P3 (3) were determined (Figure 1B). Similar forms of overlap analysis have been previously  
183 used to compare multiple datasets and obtain the significance of intersections (32). Union of  
184 intersections between the T-T and T-P and P-P after the overlap analysis results in 567 genes  
185 (Figure 1B). To reiterate the functional characteristics of the differentially expressed genes  
186 (DEGs), we scrutinized the biological processes and signaling pathways they are involved in.  
187 Pathway enrichment of 567 genes from the union of all intersections from overlap analysis  
188 (TT+TP+PP) shows that the genes are well enriched in a biological process like protein  
189 elongation, IFN signaling, chemotaxis of granulocytes, and inflammatory pathways (Figure  
190 1C). Interferons (IFNs) are secreted once the virus is detected within the cell by PRRs  
191 (pathogen recognition receptors) through a multitude of pathways involving transcription  
192 factors such as interferon regulatory factors (IRF3, IRF7, and IRF9.) and NF- $\kappa$ B. Therefore,  
193 the possibility of these 567 genes being regulated by the IFNs was also investigated. 205 genes  
194 are type I IFN regulated, 170 genes by Type II IFNs, 327 genes are both types I and type II  
195 IFN regulated while only 16 genes were determined to be regulated by all the three classes of  
196 IFNs (Figure 1D). The 16 genes are well-renowned interferon-stimulated genes (ISGs). Some  
197 direct antiviral effector ISGs (IFITs, MX1, OAS3, and OAS1.), as well as positive regulators  
198 (STAT1) of IFN response, are among the upregulated genes among these 16 ISGs, indicating  
199 an active innate antiviral response inside the cells upon SARS-CoV-2 infection.

200

201 **Ranking of genes based on cumulative score revealed differentially expressed genes**  
202 **regulating immune response and inflammatory signaling in COVID-19 patients.**

203 Since proteome dictates the outcome in a cell, genes from the union of intersections that were  
204 reported at least in one of the proteomics studies were selected for further analysis. This gave  
205 a total of 46 genes that were intersecting in T-P (26), P-P (3), TT-TP (16), TP-PP (1), and TT-  
206 TP-PP (1) overlaps (Figure 2A and 2B). A cumulative score for the 46 selected significantly  
207 upregulated genes was calculated using the sum of their log<sub>2</sub> Fold-change values and ranked  
208 (Figure 2C). The enrichment of these 46 genes in each of the datasets where the expression is  
209 reported is shown in Figure 2B. Many of these genes are directly regulated by different classes  
210 of interferons. 15 genes are regulated by IFN-I, while 8 genes by IFN-II. 20 genes are regulated  
211 by both type-I and type-II IFNs, while only 2 genes by all the three types of IFNs (Figure 2D).  
212 Most of the IFITs and other ISGs that were earlier determined in our analysis to be regulated  
213 by all the three types IFNs are no more in the list since those ISGs were only reported  
214 upregulated at transcriptome level (only in T-T overlap) and hence were lost when the genes  
215 were filtered for their upregulation at the protein level, leaving behind only MX1 and OAS3  
216 (Figure 1C and 2D). The biological functions of the selected 46 genes were also investigated  
217 to understand their roles in COVID-19 pathophysiology. The pathways enriched were mainly  
218 related to innate immune response and defense against microbes along with inflammatory and  
219 immune signaling, neutrophil degranulation, and cellular response to TNF and interferon-  
220 gamma (Figure 2E). Since these genes are significantly upregulated during the SARS-CoV-2  
221 infection, it is highly plausible that the hyperactive exaggerated immune response and  
222 inflammation leading to lung immunopathology maybe due to these unchecked responses  
223 (Figure 2E).

224 Further, to understand the pathophysiology of COVID-19, the interactions of these  
225 genes with SARS-CoV-2 proteins were inspected by analyzing the publicly available  
226 interaction data (29). Host protein-protein interactions were retrieved from the STRING  
227 database and merged with the virus-host protein-protein interactions giving a discrete picture  
228 of how the viral proteins target various cellular processes during infection. Other than NAMPT,  
229 UQCRC2, and RAB5C, it was mainly ribosomal proteins that were primary interactors to the  
230 SARS-CoV-2 proteins (Figure 2F and 2G). Ribosomal proteins, along with a eukaryotic  
231 elongation factor, were targeted by four different viral proteins (Nsp1, Nsp8, Nsp9, and N  
232 proteins of SARS-CoV-2) which suggests that cellular translation machinery is one of the

233 critical processes that is likely hijacked by the virus for its multiplication (Figure 2F). The  
234 interactions with other proteins (NAMPT, UQCRC2, and RAB5C) also explain an approach  
235 taken by the virus via direct interaction with host proteins to partially take over the system and  
236 utilize its resources efficiently for its benefits (Figure 2G). These interactions may be one of  
237 the potential ways of evading intracellular immune responses and disrupting the cellular  
238 processes that lead to the clearance of the virus. A number of upregulated proteins were  
239 predicted to localize in the intracellular organelles like endoplasmic reticulum, mitochondria,  
240 Golgi complex, and endosomes (Figure S1A). A thorough analysis of the selected list of 46  
241 genes using Human Tissue Atlas revealed that they express in various types of cells of the  
242 respiratory tract and immune effector cells known to survey infection sites (Figure S1B). The  
243 relative expression levels show that genes associated with protein synthesis (ribosomal proteins  
244 and elongation factors) are highly expressed compared to any other genes and are enriched  
245 across all the tissues in the map (Figure S1B).

246

#### 247 **Validation of selected upregulated genes in a cohort of COVID-19 patients.**

248 For further analysis using RT-qPCR, we selected all genes with a cumulative score greater than  
249 10. In addition to this, all genes belonging to the S100 family that came up within these 46  
250 genes were also selected since they are known markers of inflammation. TXN (Thioredoxin)  
251 was selected because it was at the center of the Venn diagram (Figure 2A) and hence present  
252 in significant intersections between overlaps comparing Proteome-Proteome, Transcriptome-  
253 Transcriptome, and Proteome-Transcriptome. From a total of 64 patients, nasopharyngeal  
254 swabs of 16 positive-symptomatic, 16 positive-asymptomatic, 16 negative-symptomatic, and  
255 15 negative-asymptomatic were collected and total mRNA was isolated (Table 1). The  
256 upregulation of the selected genes among 46 genes was verified by RT-qPCR on the patient  
257 samples and expressed as  $\log_2$  fold-change with respect to the negative asymptomatic group  
258 (Figure S2, Figure 3A). The heatmap depicts the enrichment of the selected genes in different  
259 patient samples (Figure 3A). We determined a direct correlation between the increasing viral  
260 load in COVID-19 patients and the upregulation of selected proteins as detected by the RT-  
261 qPCR of viral envelope (E) gene and the  $\log_2$  Fold-change of respective genes in the patient's  
262 sample. The data shows that the Ct value for the E gene was negatively correlated with  $\log_2$   
263 Fold-change of genes showing that viral load and disease severity are positively correlated  
264 (Figure S5). The upregulation of all the selected genes was found to be higher in positive  
265 symptomatic patients with a higher viral load than positive asymptomatic (Figure 3A and  
266 Figure S5). A comparative heatmap in Figure 3B gives an insight into the genes that are



267 COVID-19 specific markers, or markers for severity during SARS-CoV-2 infection, and those  
268 that are indicative of any general infection. While all the genes reported upregulated are a  
269 marker for infection (Figure 3B; NA-PS), only a few genes showed significant upregulation in  
270 a COVID-19 specific manner (Figure 3B; NS-PS). Other than S100A12 and KRT8, all other  
271 genes are significantly upregulated in symptomatic COVID-19 patients in contrast to  
272 asymptomatic COVID-19 patients and hence can be considered as prognostic markers.  
273 SERPINB3, ASS1, S100A6, and S100A9 also display a significant COVID-19-specific  
274 enrichment and hence, can be acknowledged as possible markers for prognosis of the disease  
275 (Figure 3B, NS-PS).

276 To understand the influence of age and sex on the COVID-19 pathology we chose to study the  
277 reported upregulation of genes in patient's samples by categorizing them based on age groups  
278 (30-40, 41-50, and 51-60) and gender (male and female) (Figure 3C, Figure 3D, Figure S3 and  
279 S4). The RT-qPCR analysis revealed that almost all the genes are induced in positive  
280 symptomatic patients. However, the S100 family of genes show upregulation in the case of  
281 positive symptomatic (at least 4-fold with respect to negative asymptomatic) and negative  
282 symptomatic (at least 1.9-fold with respect to negative asymptomatic where it is significant,  
283 Figure 4A) patients and it is independent of the age and sex of the patient indicating that they  
284 are common markers of infection (Figure 3A, 3C, and 3D). Neutrophil defensin alpha 3  
285 (DEFA3) is interestingly upregulated in some of the positive symptomatic patients with no  
286 biases towards a specific age group or sex. DEFA3 is a small antimicrobial peptide that has  
287 been reported to display broad-spectrum antiviral activity (33-35). Hence, an upregulation  
288 during SARS-CoV-2 infection is not surprising. However, expression of DEFA3 remained  
289 undetermined in many of the patient's samples, indicating a requirement of a larger sample size  
290 to confirm its importance for prognosis.

291

### 292 **S100 family transcripts are highly enriched in COVID-19 symptomatic patients.**

293 An upregulation of S100 proteins is reported by many studies as an indication of viral or  
294 bacterial infections (36). Interestingly, a large proportion of selected 46 DEGs include the S100  
295 family of proteins in our analyses (Figure 2B). S100A8, S100A9, S100A6, and S100P show a  
296 considerable enrichment in positive symptomatic patients in contrast to positive asymptomatic  
297 and negative symptomatic patient samples (Figure 4A). The extracellularly secreted S100  
298 proteins include S100A12, S100A8, and S100A9 (Figure S1A), all of which have been shown  
299 to serve as a danger signal and in regulating immune response (37). They activate NF-kB

300 signalling through RAGE and TLR4 pathways stimulating the cells to produce  
301 proinflammatory cytokines at the site of infection (37). It is no surprise that their enrichment  
302 in our analyses suggests that they are significantly upregulated in COVID-19 positive patients.  
303 An age-dependent upregulation of S100A6 among COVID-19 positive patients is very evident  
304 in the age group 41-50 (Figure 4B). A similar trend is observed for its upregulation independent  
305 of sex differences. S100A6 is significantly upregulated in positive symptomatic males as well  
306 as females (Figure 4C). For patients falling in the negative category, only S100A12, S100A9,  
307 and S100P show sex-based difference and all show age-based differences in 41-50 and 51-60  
308 age groups except for S100A6 which shows the significant lowering of gene expression in  
309 negative symptomatic patients falling in the 30-40 age group (Supplementary Figure 6A and  
310 B). The S100 family of proteins display considerable expression in macrophages and other  
311 immune-related cells in the tissue expression atlas indicating its involvement in inflammation  
312 and immune response across a broad range of pathogens (Figure S1B).

313

## 314 **DISCUSSION**

315 Application of high throughput OMICs technologies to understand systems level regulation of  
316 biological processes has become commonplace. A number of studies have analysed changes in  
317 global transcriptome and proteome in COVID-19 patient samples of various kinds. These  
318 studies have given overview of the cellular processes that are modulated during SARS-Co-V2  
319 infection, however translation of this knowledge into antiviral interventions requires validation  
320 and mechanistic studies. Meta-analysis of virus-host interaction Big Data is a useful approach  
321 to narrow down on key host factors involved in viral replication and pathogenesis (32, 38).  
322 Using this approach, we have performed an integrative analysis of published transcriptomics  
323 and proteomics data from COVID-19 positive nasal swab and BALF samples, to identify host  
324 factors involved in SARS-CoV-2 pathology and disease progression. In our analysis we  
325 focussed on genes which were represented in multiple orthogonal datasets, especially in  
326 proteomics data. This was done based on assumption that changes at RNA levels must also be  
327 manifested at the protein level to bring about phenotypic changes in the infected individuals  
328 during infection. Expression of the genes shortlisted through meta-analysis was tested in a  
329 cohort of nasal swab samples collected for COVID-19 diagnosis. This included samples from  
330 COVID-19 negative and positive, and within those two, samples from symptomatic and  
331 asymptomatic individuals. This was done to ensure identification of genes which are  
332 overexpressed in COVID-19 specific manner and those which indicate disease severity.

333

334 Previous meta-analysis studies by reusing BALF/PBMC/Whole blood transcriptomic data have  
335 extensively studied the immune and metabolic pathways that contribute to/counteract SARS-  
336 CoV-2 infection (39, 40) and provided insights into therapy strategies such as the use of  
337 tocilizumab against IL-6 receptor (41). A meta-analysis study that integrates orthogonal  
338 datasets of proteomics, transcriptomics and interactomes have also narrowed down on multiple  
339 pathways that are associated with immune related functions (42).

340

341 The cumulative ranking of shortlisted genes based on their upregulation showed SERPINB3 at  
342 the top (Figure 2C). SERPINB3 belongs to the serine protease inhibitor family and it inhibits  
343 papain-like cysteine proteases such as papain, cathepsin-S, -K, and -L, thus pointing towards  
344 a possible mechanism for hindering viral entry through cathepsin inhibition or prevent viral  
345 spread by interfering with proteolytic processing of Spike protein (43, 44). Furthermore,  
346 SERPINB3 has been shown to play an important role in attenuating TNF-  $\alpha$  mediated apoptosis  
347 and exhibits an anti-chemotactic effect for natural killer (NK) cells (45), and thus may mitigate  
348 the host inflammatory immune response. Additionally, SERPINB3 upregulation was more  
349 prominent in positive symptomatic patients when compared to negative asymptomatic or  
350 positive asymptomatic category, confirming its utility as a COVID-19-specific disease severity  
351 marker (Figure 3B). Other notable SERPIN family members like SERPINB1 (which came up  
352 during our cumulative score ranking, Figure 2C) and SERPINE1 has been shown to restrict  
353 pathogenesis of influenza, the latter by preventing influenza A glycoprotein maturation (46,  
354 47). SERPINA1 deficiencies or mutations in populations were found to be associated with  
355 severe forms of COVID-19 and IL-6 to  $\alpha$ 1-antitrypsin (protein coded by SERPINA1) ratios  
356 positively correlated with disease severity and mortality (48, 49). Notably, several ribosomal  
357 proteins (RPs) emerged as highly upregulated proteins in the patient samples (RSP3A, RPL4,  
358 RPL5, RPL18, RPL13A, RPS4X, RPL7A, RPS9, and RPS3) as evident from the enriched GO  
359 term “peptide chain elongation”. Previous studies have shown that ribosomal proteins (RPs)  
360 are hijacked by different viruses during infection to activate IRES-mediated translation of viral  
361 proteins (50-57) . Besides an upregulation, RPs are also recorded to directly interact with viral  
362 proteins (50, 58, 59). Our inspection for possible interactions between the ribosomal proteins  
363 that came up in our list with the SARS-CoV-2 proteins revealed that nsp1, nsp8, nsp9 and  
364 nucleocapsid (N) proteins of SARS-CoV-2 directly interact with the host ribosomal proteins  
365 (Figure 3C). Considering these data, it is likely RPs in our list may be targeted by SARS-Co-  
366 V2 proteins for selective translation of viral proteins.

367

368 Several genes shortlisted through our analysis play direct or indirect role in prepping the cell  
369 for combating the infection. The GO analyses showed, pathways like “antimicrobial humoral  
370 response”, “Response to interferon-gamma”, “interferon alpha-beta signalling”, “granulocyte  
371 activation”, “response to interferon-alpha” “granulocyte chemotaxis”, neutrophil  
372 degranulation” to be highly enriched. Cornification is another significantly enriched pathway  
373 which has been reported to regulate expression of proteins involved in restructuring the cellular  
374 architecture like keratin proteins during viral infection (60-65). The viruses also exploit the  
375 cytoskeletal elements for their entry, assembly and exit of viral particles, thus explaining the  
376 enrichment of pathways like “plasma membrane bounded cell projection assembly”,  
377 “cytoskeleton-dependent intracellular transport”, “actin cytoskeleton organization” and  
378 “vesicle cytoskeletal trafficking” appearing in our analysis.

379

380 From analysis of potential direct interactions between the viral and host proteins during  
381 infection based on published interactome data, UQCRC2 (Cytochrome b-c1 complex subunit  
382 2) was found to be interacting with 5 different SARS-CoV-2 proteins, orf7a, nsp7, nsp2, orf9c,  
383 and Membrane (M) (Figure 2G). We reasoned this unique finding as a mechanism of induction  
384 of oxidative mitochondrial dysfunction that affects ATP production (66, 67). UQCRC2 directly  
385 interacts with critical components of respiratory chain complexes II and IV that have been  
386 reported to be upregulated during viral infections, affecting ATP production in the infected  
387 cells that is utilized by the virus for its replication (66). Nicotinamide phosphoribosyl  
388 transferase (NAMPT), which catalyses a rate-limiting step in de novo NAD biosynthesis, was  
389 another cellular factor in our list , with potential interactions with SARS-Co-V2 M, Orf8 and  
390 Orf9c proteins (Fig 2G) (68-70). A recent finding on SARS-CoV-2 reports that the virus causes  
391 a downregulation of the de novo NAD biosynthetic pathway (71). This suggests that NAMPT,  
392 being an enzyme critical in de novo pathway, maybe a direct target for modulation which is  
393 evident in our analyses.

394

395 A subset of upregulated proteins is secretory including S100A12, S100A8, S100A9,  
396 SERPINB3, DEFA3, LCN2 and TXN. LCN2, which came up in our study was previously  
397 shown to be an important biomarker for viral infection (72, 73), and was also reported to be  
398 upregulated in transcriptomic and proteomic studies in COVID-19 patients (74, 75). It has been  
399 shown that virus replication and inflammation goes down when thioredoxin reductase, a  
400 reducing agent of TXN is inhibited using auranofin, pointing towards the importance of redox

401 environment during SARS-CoV2 pathogenesis (76), akin to many inflammatory responses  
402 which are governed by the redox status of the cell (77). We observed upregulation of members  
403 of the S100 family of genes like S100A8, S100A9, S100A6, and S100P in severe COVID-19  
404 specific manner. It was reported that increased S100A8/A9 (calprotectin) levels in serum of  
405 COVID-19 patients has been correlated with severe forms of the disease (78, 79). These were  
406 also observed with increased incidence of neutrophil extracellular trap formation and clinical  
407 thrombosis in patients (80). Our findings also align with transcriptomic studies on lung tissue  
408 of fatal COVID-19 cases which report an upregulation in S100A12, S100A8, S100A9, and  
409 S100P in patients (81). Taken together S100 family of genes can be indicative of COVID-19  
410 infection and disease progression and can be considered as prognostic markers.

411  
412 Our comprehensive analyses of transcriptome and proteome data along with experimental  
413 validation of upregulated genes in COVID-19 cohort lead us to a set of host factors that have  
414 direct implications in the SARS-CoV-2 infection and associated diseases. The age and sex-  
415 based differences in gene expression that we observed highlight the varied individual  
416 responses. Many previous studies have also noted the biases in COVID-19 outcomes among  
417 age and sex groups (82-85), drawing attention to their robustness of immune responses and  
418 overall physiology. Overall, our data suggests that S100A6, S100A9, S100A8, SERPINB3,  
419 TXN, and ASS1 exhibit upregulation with the disease severity and progression in COVID-19  
420 patients. However, an exhaustive investigation to dissect their direct roles and correlation with  
421 infection is required to certainly declare them as COVID-19 prognostic markers.

422  
423 Strikingly, we observed several cellular pathways and signalling cascades being directly  
424 targeted by SARS-CoV-2 through the understanding of transcriptome and proteome changes  
425 in bronchoalveolar lavage fluids (BALF) and nasopharyngeal swab samples from COVID-19  
426 positive symptomatic and asymptomatic patients. Our study discusses the ungrateful aspects  
427 of COVID-19 infection and host response at the site of infection. In any infection, knowledge  
428 of affected cellular signalling pathways opens the road to drug repurposing and novel  
429 therapeutic strategies. Drugs that target host factors rather than viral proteins help surpass the  
430 problem of high mutation rates of viruses that could reduce the efficacy of the latter. Studying  
431 enriched pathways and genes also provide insights into unique antiviral immune responses by  
432 the host or immune evasion strategies deployed by the virus. The findings of this study explore  
433 both these aspects and also look into the strategies shared by SARS-CoV-2 compared to other  
434 previously known viral infections. It reaffirms the need for integrated approaches for

435 investigating host-pathogen interactions as opposed to isolated pathways in a beautifully  
436 chaotic cell.

437

438

439 **FUNDING:** This study was supported by funds from the DBT-IISc partnership program (DBT  
440 (IED/4/2020-MED/DBT)) and the Infosys Young Investigator award (YI/2019/1106) in the ST  
441 lab. ST is an Intermediate fellow of Wellcome trust-DBT India Alliance (IA/I/18/1/503613).  
442 AS is a Senior fellow of Wellcome trust-DBT India Alliance (IA/S/16/2/50270). AB is  
443 supported by KVPY (Kishore Vaigyanik Protsahan Yojana) fellowship from DST, India. SS is  
444 supported by PMRF (Prime Minister's Research Fellowship) from the Ministry of Education,  
445 India.

446

447 **ACKNOWLEDGMENTS:** We thank Venitha Bernard for technical help with data analysis.  
448 We thank Prof. Umesh Varshney and Prof. K.N.Balaji for their administrative support.

449

## 450 REFERENCES

451

- 452 1. Coronaviridae Study Group of the International Committee on Taxonomy of V. The species  
453 Severe acute respiratory syndrome-related coronavirus: classifying 2019-nCoV and naming it SARS-  
454 CoV-2. *Nat Microbiol.* 2020;5(4):536-44.
- 455 2. Hasanoglu I, Korukluoglu G, Asilturk D, Cosgun Y, Kalem AK, Altas AB, et al. Higher viral loads  
456 in asymptomatic COVID-19 patients might be the invisible part of the iceberg. *Infection.*  
457 2021;49(1):117-26.
- 458 3. Li Y, Shi J, Xia J, Duan J, Chen L, Yu X, et al. Asymptomatic and Symptomatic Patients With Non-  
459 severe Coronavirus Disease (COVID-19) Have Similar Clinical Features and Virological Courses: A  
460 Retrospective Single Center Study. *Front Microbiol.* 2020;11:1570.
- 461 4. Naqvi AAT, Fatima K, Mohammad T, Fatima U, Singh IK, Singh A, et al. Insights into SARS-CoV-  
462 2 genome, structure, evolution, pathogenesis and therapies: Structural genomics approach. *Biochim*  
463 *Biophys Acta Mol Basis Dis.* 2020;1866(10):165878.
- 464 5. Samuel CE. Antiviral actions of interferons. *Clin Microbiol Rev.* 2001;14(4):778-809, table of  
465 contents.
- 466 6. de Wit E, van Doremalen N, Falzarano D, Munster VJ. SARS and MERS: recent insights into  
467 emerging coronaviruses. *Nat Rev Microbiol.* 2016;14(8):523-34.
- 468 7. Casadevall A, Pirofski LA. The damage-response framework of microbial pathogenesis. *Nat Rev*  
469 *Microbiol.* 2003;1(1):17-24.
- 470 8. Henry BM, de Oliveira MHS, Benoit S, Plebani M, Lippi G. Hematologic, biochemical and  
471 immune biomarker abnormalities associated with severe illness and mortality in coronavirus disease  
472 2019 (COVID-19): a meta-analysis. *Clin Chem Lab Med.* 2020;58(7):1021-8.
- 473 9. Velavan TP, Meyer CG. Mild versus severe COVID-19: Laboratory markers. *Int J Infect Dis.*  
474 2020;95:304-7.

- 475 10. Pan F, Yang L, Li Y, Liang B, Li L, Ye T, et al. Factors associated with death outcome in patients  
476 with severe coronavirus disease-19 (COVID-19): a case-control study. *Int J Med Sci*. 2020;17(9):1281-  
477 92.
- 478 11. Liu F, Li L, Xu M, Wu J, Luo D, Zhu Y, et al. Prognostic value of interleukin-6, C-reactive protein,  
479 and procalcitonin in patients with COVID-19. *J Clin Virol*. 2020;127:104370.
- 480 12. Huang C, Wang Y, Li X, Ren L, Zhao J, Hu Y, et al. Clinical features of patients infected with 2019  
481 novel coronavirus in Wuhan, China. *Lancet*. 2020;395(10223):497-506.
- 482 13. Chen N, Zhou M, Dong X, Qu J, Gong F, Han Y, et al. Epidemiological and clinical characteristics  
483 of 99 cases of 2019 novel coronavirus pneumonia in Wuhan, China: a descriptive study. *Lancet*.  
484 2020;395(10223):507-13.
- 485 14. Zhou Z, Ren L, Zhang L, Zhong J, Xiao Y, Jia Z, et al. Heightened Innate Immune Responses in  
486 the Respiratory Tract of COVID-19 Patients. *Cell Host Microbe*. 2020;27(6):883-90 e2.
- 487 15. Grant RA, Morales-Nebreda L, Markov NS, Swaminathan S, Querrey M, Guzman ER, et al.  
488 Circuits between infected macrophages and T cells in SARS-CoV-2 pneumonia. *Nature*. 2021.
- 489 16. Xiong Y, Liu Y, Cao L, Wang D, Guo M, Jiang A, et al. Transcriptomic characteristics of  
490 bronchoalveolar lavage fluid and peripheral blood mononuclear cells in COVID-19 patients. *Emerg*  
491 *Microbes Infect*. 2020;9(1):761-70.
- 492 17. Rivera B, Leyva A, Portela MM, Moratorio G, Moreno P, Duran R, et al. Quantitative proteomic  
493 dataset from oro- and naso-pharyngeal swabs used for COVID-19 diagnosis: Detection of viral proteins  
494 and host's biological processes altered by the infection. *Data Brief*. 2020;32:106121.
- 495 18. Akgun E, Tuzuner MB, Sahin B, Kilercik M, Kulah C, Cakiroglu HN, et al. Proteins associated  
496 with neutrophil degranulation are upregulated in nasopharyngeal swabs from SARS-CoV-2 patients.  
497 *PLoS One*. 2020;15(10):e0240012.
- 498 19. Maras JS, Sharma S, Bhat A, aggrawal R, Gupta E, Sarin SK. Multi-Omics integration analysis of  
499 respiratory specimen characterizes baseline molecular determinants associated with COVID-19  
500 diagnosis. 2020:2020.07.06.20147082.
- 501 20. Perez-Riverol Y, Csordas A, Bai J, Bernal-Llinares M, Hewapathirana S, Kundu DJ, et al. The  
502 PRIDE database and related tools and resources in 2019: improving support for quantification data.  
503 *Nucleic Acids Res*. 2019;47(D1):D442-D50.
- 504 21. Barrett T, Wilhite SE, Ledoux P, Evangelista C, Kim IF, Tomashevsky M, et al. NCBI GEO: archive  
505 for functional genomics data sets--update. *Nucleic Acids Res*. 2013;41(Database issue):D991-5.
- 506 22. Huang H, McGarvey PB, Suzek BE, Mazumder R, Zhang J, Chen Y, et al. A comprehensive  
507 protein-centric ID mapping service for molecular data integration. *Bioinformatics*. 2011;27(8):1190-1.
- 508 23. L. S, ISOmaM. S. GeneOverlap: Test and visualize gene overlaps. R package version 1.26.0  
509 ed2020.
- 510 24. Zhou Y, Zhou B, Pache L, Chang M, Khodabakhshi AH, Tanaseichuk O, et al. Metascape  
511 provides a biologist-oriented resource for the analysis of systems-level datasets. *Nat Commun*.  
512 2019;10(1):1523.
- 513 25. Wickham H. *ggplot2: Elegant Graphics for Data Analysis*: Springer-Verlag New York; 2016.
- 514 26. Rusinova I, Forster S, Yu S, Kannan A, Masse M, Cumming H, et al. Interferome v2.0: an  
515 updated database of annotated interferon-regulated genes. *Nucleic Acids Res*. 2013;41(Database  
516 issue):D1040-6.
- 517 27. UniProt C. UniProt: a worldwide hub of protein knowledge. *Nucleic Acids Res*.  
518 2019;47(D1):D506-D15.
- 519 28. Thul PJ, Akesson L, Wiking M, Mahdessian D, Geladaki A, Ait Blal H, et al. A subcellular map of  
520 the human proteome. *Science*. 2017;356(6340).
- 521 29. Gordon DE, Jang GM, Bouhaddou M, Xu J, Obernier K, White KM, et al. A SARS-CoV-2 protein  
522 interaction map reveals targets for drug repurposing. *Nature*. 2020;583(7816):459-68.
- 523 30. Shannon P, Markiel A, Ozier O, Baliga NS, Wang JT, Ramage D, et al. Cytoscape: a software  
524 environment for integrated models of biomolecular interaction networks. *Genome Res*.  
525 2003;13(11):2498-504.

- 526 31. Gu Z, Eils R, Schlesner M. Complex heatmaps reveal patterns and correlations in  
527 multidimensional genomic data. *Bioinformatics*. 2016;32(18):2847-9.
- 528 32. Bushman FD, Malani N, Fernandes J, D'Orso I, Cagney G, Diamond TL, et al. Host cell factors in  
529 HIV replication: meta-analysis of genome-wide studies. *PLoS Pathog*. 2009;5(5):e1000437.
- 530 33. Klotman ME, Chang TL. Defensins in innate antiviral immunity. *Nat Rev Immunol*.  
531 2006;6(6):447-56.
- 532 34. Quinones-Mateu ME, Lederman MM, Feng Z, Chakraborty B, Weber J, Rangel HR, et al. Human  
533 epithelial beta-defensins 2 and 3 inhibit HIV-1 replication. *AIDS*. 2003;17(16):F39-48.
- 534 35. Proud D, Sanders SP, Wiehler S. Human rhinovirus infection induces airway epithelial cell  
535 production of human beta-defensin 2 both in vitro and in vivo. *J Immunol*. 2004;172(7):4637-45.
- 536 36. Donato R, Cannon BR, Sorci G, Riuzzi F, Hsu K, Weber DJ, et al. Functions of S100 proteins. *Curr*  
537 *Mol Med*. 2013;13(1):24-57.
- 538 37. Xia C, Braunstein Z, Toomey AC, Zhong J, Rao X. S100 Proteins As an Important Regulator of  
539 Macrophage Inflammation. *Front Immunol*. 2017;8:1908.
- 540 38. Tripathi S, Pohl MO, Zhou Y, Rodriguez-Frandsen A, Wang G, Stein DA, et al. Meta- and  
541 Orthogonal Integration of Influenza "OMICs" Data Defines a Role for UBR4 in Virus Budding. *Cell Host*  
542 *Microbe*. 2015;18(6):723-35.
- 543 39. Sheerin D, Abhimanyu, Wang X, Johnson WE, Coussens A. Systematic evaluation of  
544 transcriptomic disease risk and diagnostic biomarker overlap between COVID-19 and tuberculosis: a  
545 patient-level meta-analysis. *medRxiv*. 2020.
- 546 40. Gardinassi LG, Souza COS, Sales-Campos H, Fonseca SG. Immune and Metabolic Signatures of  
547 COVID-19 Revealed by Transcriptomics Data Reuse. *Front Immunol*. 2020;11:1636.
- 548 41. Coomes EA, Haghbayan H. Interleukin-6 in Covid-19: A systematic review and meta-analysis.  
549 *Rev Med Virol*. 2020;30(6):1-9.
- 550 42. Parkinson N, Rodgers N, Head Fourman M, Wang B, Zechner M, Swets MC, et al. Dynamic  
551 data-driven meta-analysis for prioritisation of host genes implicated in COVID-19. *Sci Rep*.  
552 2020;10(1):22303.
- 553 43. Schick C, Pemberton PA, Shi GP, Kamachi Y, Cataltepe S, Bartuski AJ, et al. Cross-class inhibition  
554 of the cysteine proteinases cathepsins K, L, and S by the serpin squamous cell carcinoma antigen 1: a  
555 kinetic analysis. *Biochemistry*. 1998;37(15):5258-66.
- 556 44. Ou X, Liu Y, Lei X, Li P, Mi D, Ren L, et al. Characterization of spike glycoprotein of SARS-CoV-2  
557 on virus entry and its immune cross-reactivity with SARS-CoV. *Nat Commun*. 2020;11(1):1620.
- 558 45. Vidalino L, Doria A, Quarta S, Zen M, Gatta A, Pontisso P. SERPINB3, apoptosis and  
559 autoimmunity. *Autoimmun Rev*. 2009;9(2):108-12.
- 560 46. Dittmann M, Hoffmann HH, Scull MA, Gilmore RH, Bell KL, Ciancanelli M, et al. A serpin shapes  
561 the extracellular environment to prevent influenza A virus maturation. *Cell*. 2015;160(4):631-43.
- 562 47. Gong D, Farley K, White M, Hartshorn KL, Benarafa C, Remold-O'Donnell E. Critical role of  
563 serpinB1 in regulating inflammatory responses in pulmonary influenza infection. *J Infect Dis*.  
564 2011;204(4):592-600.
- 565 48. McElvaney OJ, McEvoy NL, McElvaney OF, Carroll TP, Murphy MP, Dunlea DM, et al.  
566 Characterization of the Inflammatory Response to Severe COVID-19 Illness. *Am J Respir Crit Care Med*.  
567 2020;202(6):812-21.
- 568 49. Yang C, Chapman KR, Wong A, Liu M. alpha1-Antitrypsin deficiency and the risk of COVID-19:  
569 an urgent call to action. *Lancet Respir Med*. 2021.
- 570 50. Dong HJ, Zhang R, Kuang Y, Wang XJ. Selective regulation in ribosome biogenesis and protein  
571 production for efficient viral translation. *Arch Microbiol*. 2020.
- 572 51. Huang JY, Su WC, Jeng KS, Chang TH, Lai MM. Attenuation of 40S ribosomal subunit abundance  
573 differentially affects host and HCV translation and suppresses HCV replication. *PLoS Pathog*.  
574 2012;8(6):e1002766.
- 575 52. Landry DM, Hertz MI, Thompson SR. RPS25 is essential for translation initiation by the  
576 Dicistroviridae and hepatitis C viral IRESs. *Genes Dev*. 2009;23(23):2753-64.



- 577 53. Fukushi S, Okada M, Stahl J, Kageyama T, Hoshino FB, Katayama K. Ribosomal protein S5  
578 interacts with the internal ribosomal entry site of hepatitis C virus. *J Biol Chem.* 2001;276(24):20824-  
579 6.
- 580 54. Bhat P, Shwetha S, Sharma DK, Joseph AP, Srinivasan N, Das S. The beta hairpin structure  
581 within ribosomal protein S5 mediates interplay between domains II and IV and regulates HCV IRES  
582 function. *Nucleic Acids Res.* 2015;43(5):2888-901.
- 583 55. Majzoub K, Hafirassou ML, Meignin C, Goto A, Marzi S, Fedorova A, et al. RACK1 controls IRES-  
584 mediated translation of viruses. *Cell.* 2014;159(5):1086-95.
- 585 56. Shi Z, Fujii K, Kovary KM, Genuth NR, Rost HL, Teruel MN, et al. Heterogeneous Ribosomes  
586 Preferentially Translate Distinct Subpools of mRNAs Genome-wide. *Mol Cell.* 2017;67(1):71-83 e7.
- 587 57. Wood J, Frederickson RM, Fields S, Patel AH. Hepatitis C virus 3'X region interacts with human  
588 ribosomal proteins. *J Virol.* 2001;75(3):1348-58.
- 589 58. Chen Y, Lu Z, Zhang L, Gao L, Wang N, Gao X, et al. Ribosomal protein L4 interacts with viral  
590 protein VP3 and regulates the replication of infectious bursal disease virus. *Virus Res.* 2016;211:73-8.
- 591 59. Liu QH, Ma FF, Guan GK, Wang XF, Li C, Huang J. White spot syndrome virus VP51 interact with  
592 ribosomal protein L7 of *Litopenaeus vannamei*. *Fish Shellfish Immunol.* 2015;44(1):382-8.
- 593 60. Domachowske JB, Bonville CA, Rosenberg HF. Cytokeratin 17 is expressed in cells infected with  
594 respiratory syncytial virus via NF-kappaB activation and is associated with the formation of cytopathic  
595 syncytia. *J Infect Dis.* 2000;182(4):1022-8.
- 596 61. Hamaguchi M, Nishikawa K, Toyoda T, Yoshida T, Hanaichi T, Nagai Y. Transcriptional complex  
597 of Newcastle disease virus. II. Structural and functional assembly associated with the cytoskeletal  
598 framework. *Virology.* 1985;147(2):295-308.
- 599 62. De BP, Lesoon A, Banerjee AK. Human parainfluenza virus type 3 transcription in vitro: role of  
600 cellular actin in mRNA synthesis. *J Virol.* 1991;65(6):3268-75.
- 601 63. Huang YT, Romito RR, De BP, Banerjee AK. Characterization of the in vitro system for the  
602 synthesis of mRNA from human respiratory syncytial virus. *Virology.* 1993;193(2):862-7.
- 603 64. Arcangeletti MC, Pinardi F, Missorini S, De Conto F, Conti G, Portincasa P, et al. Modification  
604 of cytoskeleton and prosome networks in relation to protein synthesis in influenza A virus-infected  
605 LLC-MK2 cells. *Virus Res.* 1997;51(1):19-34.
- 606 65. Staufienbiel M, Epple P, Deppert W. Progressive reorganization of the host cell cytoskeleton  
607 during adenovirus infection. *J Virol.* 1986;60(3):1186-91.
- 608 66. Fu X, Jiang X, Chen X, Zhu L, Zhang G. The Differential Expression of Mitochondrial Function-  
609 Associated Proteins and Antioxidant Enzymes during Bovine Herpesvirus 1 Infection: A Potential  
610 Mechanism for Virus Infection-Induced Oxidative Mitochondrial Dysfunction. *Mediators Inflamm.*  
611 2019;2019:7072917.
- 612 67. Derakhshan M, Willcocks MM, Salako MA, Kass GEN, Carter MJ. Human herpesvirus 1 protein  
613 US3 induces an inhibition of mitochondrial electron transport. *J Gen Virol.* 2006;87(Pt 8):2155-9.
- 614 68. Belenky P, Bogan KL, Brenner C. NAD<sup>+</sup> metabolism in health and disease. *Trends Biochem Sci.*  
615 2007;32(1):12-9.
- 616 69. Wu C, Liu Y, Yang Y, Zhang P, Zhong W, Wang Y, et al. Analysis of therapeutic targets for SARS-  
617 CoV-2 and discovery of potential drugs by computational methods. *Acta Pharm Sin B.* 2020;10(5):766-  
618 88.
- 619 70. Garten A, Schuster S, Penke M, Gorski T, de Giorgis T, Kiess W. Physiological and  
620 pathophysiological roles of NAMPT and NAD metabolism. *Nat Rev Endocrinol.* 2015;11(9):535-46.
- 621 71. Heer CD, Sanderson DJ, Voth LS, Alhammad YMO, Schmidt MS, Trammell SAJ, et al.  
622 Coronavirus and PARP expression dysregulate the NAD Metabolome: a potentially actionable  
623 component of innate immunity. *bioRxiv.* 2020.
- 624 72. Sawatzky J, Soo J, Conroy AL, Bhargava R, Namasopo S, Opoka RO, et al. Biomarkers of  
625 Systemic Inflammation in Ugandan Infants and Children Hospitalized With Respiratory Syncytial Virus  
626 Infection. *Pediatr Infect Dis J.* 2019;38(8):854-9.

- 627 73. Bogorodskaya M, Fitch KV, Burdo TH, Maehler P, Easley RM, Murray GR, et al. Serum Lipocalin  
628 2 (Neutrophil Gelatinase-Associated Lipocalin) in Relation to Biomarkers of Inflammation and Cardiac  
629 Stretch During Activation of the Renin-Angiotensin-Aldosterone System in Human Immunodeficiency  
630 Virus. *J Infect Dis.* 2019;220(9):1420-4.
- 631 74. Li G, Wang J, He X, Zhang L, Ran Q, Xiong A, et al. An integrative analysis identifying  
632 transcriptional features and key genes involved in COVID-19. *Epigenomics.* 2020;12(22):1969-81.
- 633 75. Zeng HL, Chen D, Yan J, Yang Q, Han QQ, Li SS, et al. Proteomic characteristics of  
634 bronchoalveolar lavage fluid in critical COVID-19 patients. *FEBS J.* 2020.
- 635 76. Rothan HA, Stone S, Natekar J, Kumari P, Arora K, Kumar M. The FDA-approved gold drug  
636 auranofin inhibits novel coronavirus (SARS-CoV-2) replication and attenuates inflammation in human  
637 cells. *Virology.* 2020;547:7-11.
- 638 77. Griffiths HR, Gao D, Pararasa C. Redox regulation in metabolic programming and  
639 inflammation. *Redox Biol.* 2017;12:50-7.
- 640 78. Chen L, Long X, Xu Q, Tan J, Wang G, Cao Y, et al. Elevated serum levels of S100A8/A9 and  
641 HMGB1 at hospital admission are correlated with inferior clinical outcomes in COVID-19 patients. *Cell  
642 Mol Immunol.* 2020;17(9):992-4.
- 643 79. Shi H, Zuo Y, Yalavarthi S, Gockman K, Zuo M, Madison JA, et al. Neutrophil calprotectin  
644 identifies severe pulmonary disease in COVID-19. *J Leukoc Biol.* 2020.
- 645 80. Zuo Y, Zuo M, Yalavarthi S, Gockman K, Madison JA, Shi H, et al. Neutrophil extracellular traps  
646 and thrombosis in COVID-19. *J Thromb Thrombolysis.* 2020.
- 647 81. Wu M, Chen Y, Xia H, Wang C, Tan CY, Cai X, et al. Transcriptional and proteomic insights into  
648 the host response in fatal COVID-19 cases. *Proc Natl Acad Sci U S A.* 2020;117(45):28336-43.
- 649 82. Takahashi T, Ellingson MK, Wong P, Israelow B, Lucas C, Klein J, et al. Sex differences in  
650 immune responses that underlie COVID-19 disease outcomes. *Nature.* 2020;588(7837):315-20.
- 651 83. Haitao T, Vermunt JV, Abeykoon J, Ghamrawi R, Gunaratne M, Jayachandran M, et al. COVID-  
652 19 and Sex Differences: Mechanisms and Biomarkers. *Mayo Clin Proc.* 2020;95(10):2189-203.
- 653 84. Lieberman NAP, Peddu V, Xie H, Shrestha L, Huang ML, Mears MC, et al. In vivo antiviral host  
654 transcriptional response to SARS-CoV-2 by viral load, sex, and age. *PLoS Biol.* 2020;18(9):e3000849.
- 655 85. O'Driscoll M, Ribeiro Dos Santos G, Wang L, Cummings DAT, Azman AS, Paireau J, et al. Age-  
656 specific mortality and immunity patterns of SARS-CoV-2. *Nature.* 2021;590(7844):140-5.

657

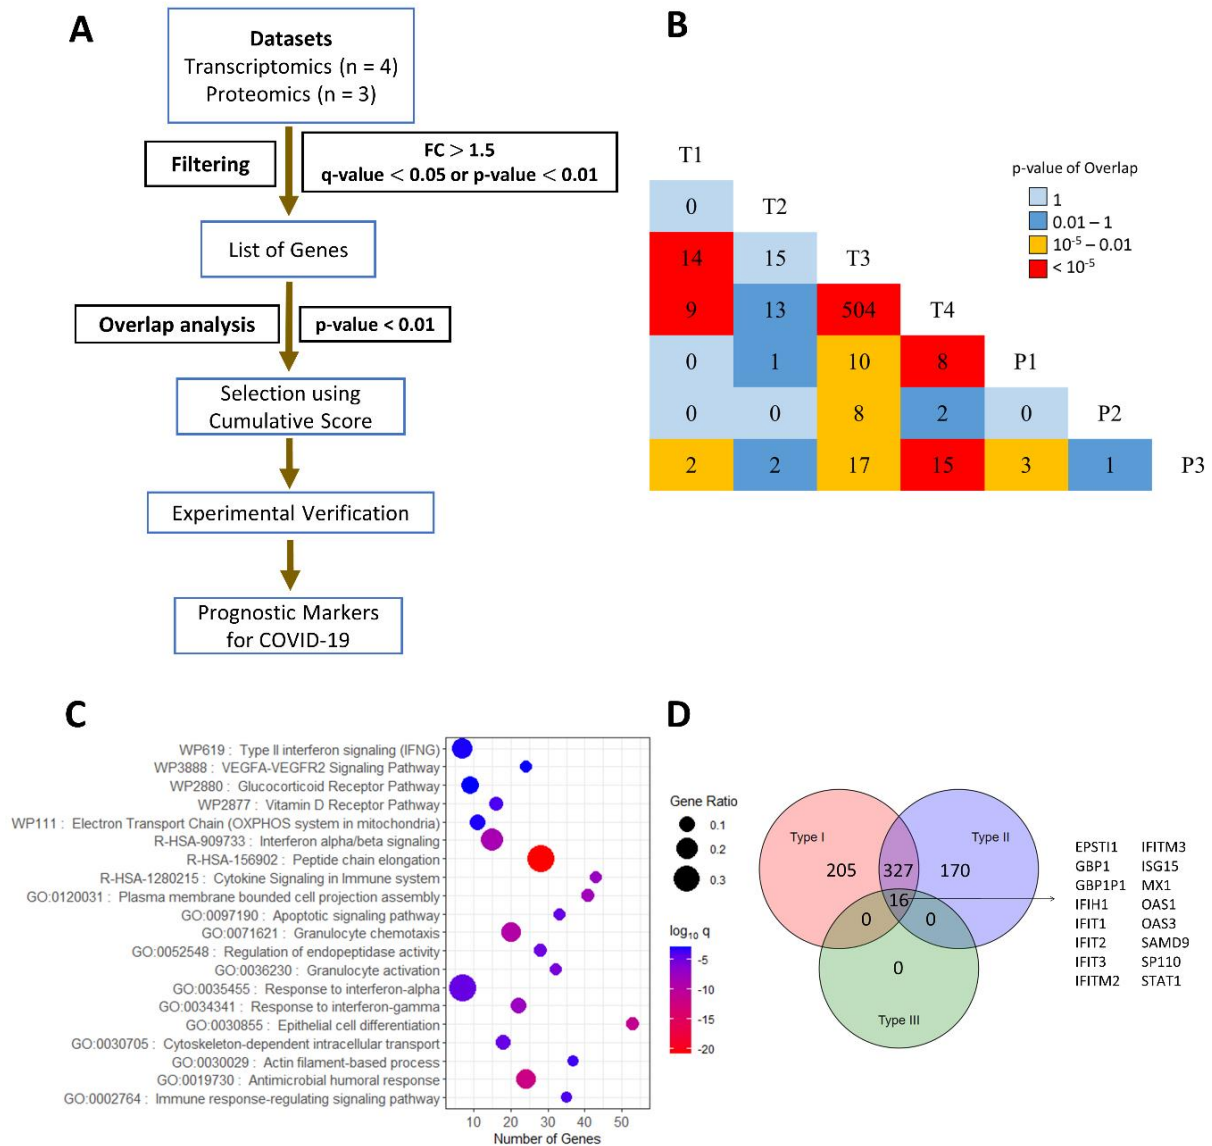

658

659 **Figure 1: Meta-analysis pipeline for gene prioritisation and associate pathway analysis.**

660 **A)** Three proteomics and four transcriptomics datasets were chosen to obtain biomarkers for  
 661 COVID-19 in humans. Genes/proteins that came up in these studies with a fold change greater  
 662 than 1.5 and a q-value less than 0.05 (p-value less than 0.01 was taken in cases where q value  
 663 is not provided) were subjected to pairwise overlap analysis. Genes that fall under significant  
 664 intersections and represented in at least one proteomic dataset were sorted using cumulative  
 665 scores to be experimentally verified. **B)** Triangular heatmap showing pairwise overlaps  
 666 between transcriptomic and proteomic datasets. The number within each box denotes the  
 667 number of genes that showed up between the corresponding intersections. The colour of a box  
 668 denotes the significance of overlap. **C)** Gene ontology of all genes (567) in the significant  
 669 intersections obtained during the overlap analysis plotted with the number of genes in each

670 term on the X-axis, proportion of genes enriched compared to the total number of genes in each  
671 term as the size of dots and the colour representing  $\log_{10}$  p-adj value (q-value) of enrichment.  
672 **D)** Venn diagram showing the number of genes that are induced by Type I, II, or III interferons.  
673 The analysis was performed on Interferome v2.01 using the union of significant intersections  
674 (567)

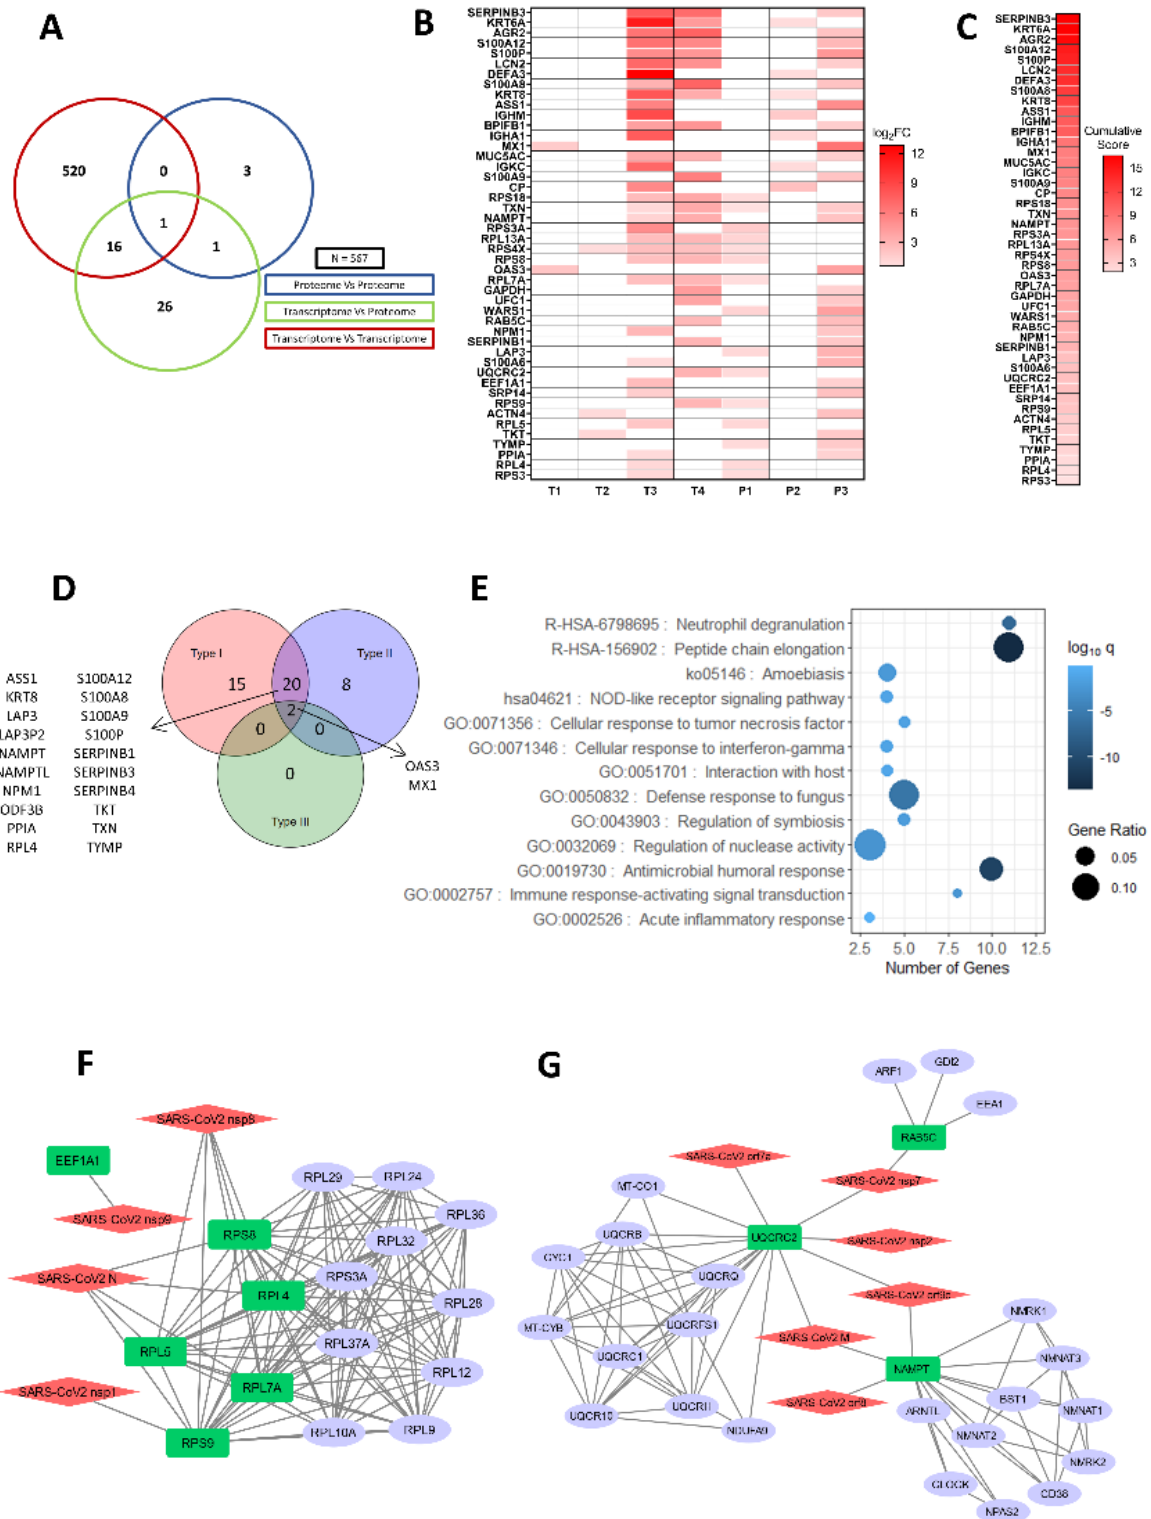

675

676 **Figure 2: Cumulative score ranking, pathway and interactome analysis of selected host**  
 677 **factors. A)** Venn diagram of genes obtained from significant intersections among proteomic  
 678 or transcriptomic datasets after pairwise overlap analysis. **B)** Genes in the Venn diagram that  
 679 were found in at least one proteomic dataset with their log<sub>2</sub>FC values in the datasets where they  
 680 are present. Boxes coloured in white denote that the gene is not present in the particular dataset.

681 **C)** Genes arranged in descending order of cumulative scores obtained as a sum of  $\log_2FC$   
682 values in the datasets where they are present. **D)** Venn diagram showing the number of  
683 interferon-induced genes performed using Interferome v2.01 for 46 selected genes. **E)** Gene  
684 ontology of 46 genes plotted with the number of genes in each term on the X-axis, the  
685 proportion of genes enriched compared to the total number of genes in each term as the size of  
686 dots and the colour representing  $\log_{10}$  p-adj value (q-value) of enrichment. **F, G)** Virus-host  
687 protein-protein interactions among SARS-CoV2 proteins and significant genes in the overlap  
688 analysis that shows up in at least one proteomic dataset modelled using Cytoscape v3.8.0. A  
689 STRING interactome for the primary interactors of SARS-CoV-2 proteins was merged  
690 (confidence  $\geq 0.999$  for all the proteins and confidence  $\geq 0.90$  for NAMPT; max number of  
691 interactors = 10). Red: SARS-CoV-2 proteins, Green: Host proteins (primary interactor), blue:  
692 STRING interactors (other cellular proteins interacting with the primary interactors).

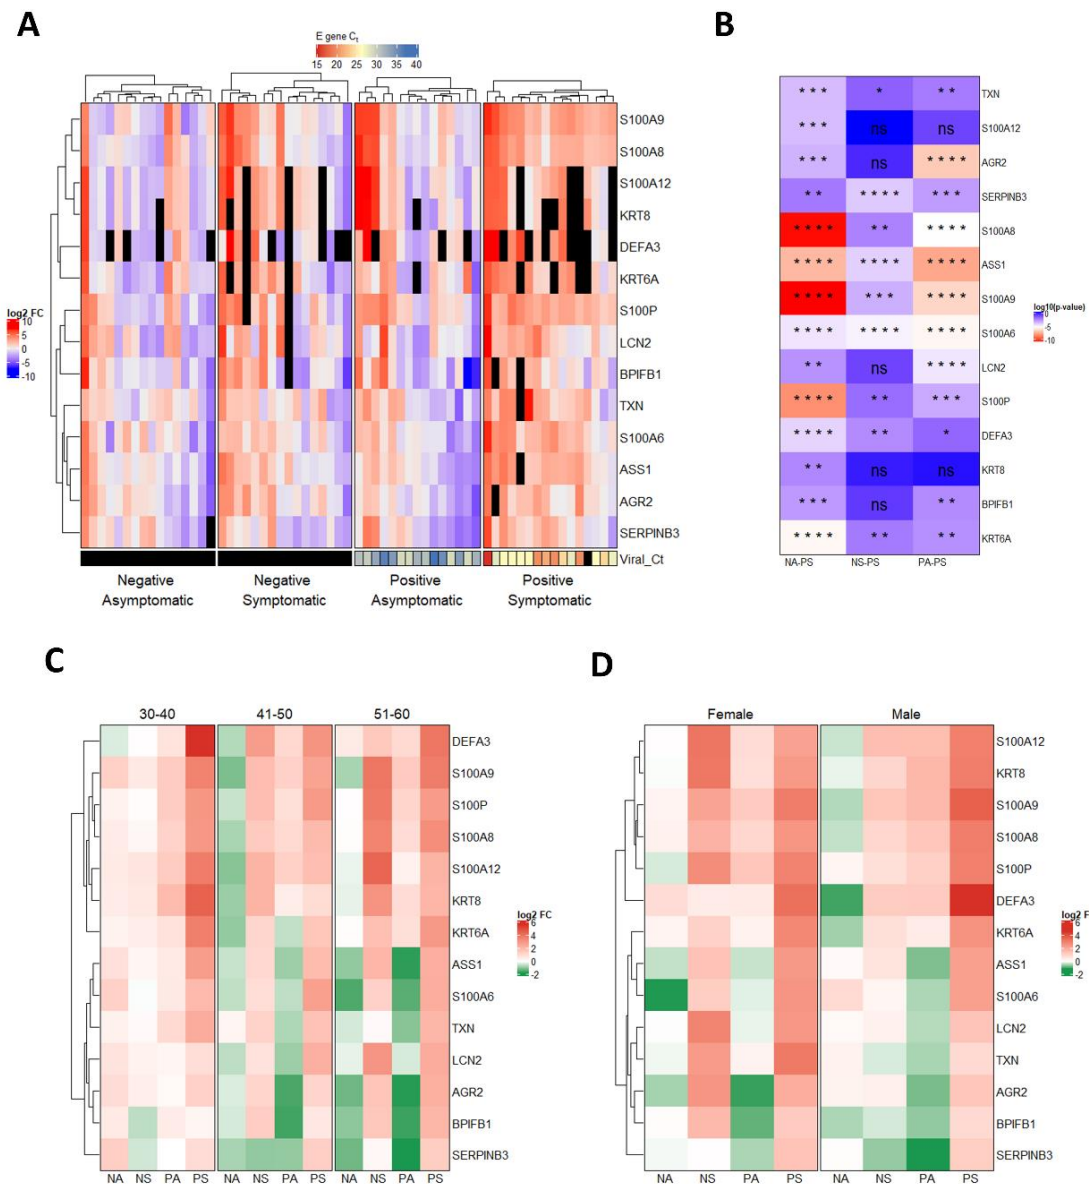

693

694 **Figure 3: RT-qPCR validated expression profile of selected genes in different categories**

695 **of COVID-19 cohort A)** RT-qPCR was performed on RNA isolated from COVID-19 patients

696 for 14 genes and average  $\log_2$  Fold-change values (with respect to Negative Asymptomatic

697 group) of PCR triplicates are shown in a heatmap. Each column represents a patient and

698 clustering was performed for columns and within row slices. The bottom annotation shows the

699  $C_1$  value for the viral gene encoding Envelope (E) protein with a corresponding legend on the

700 top. Black boxes denote 'value unknown'. **B)** Differences between groups for each gene were

701 computed using the Mann-Whitney rank-sum test (paired = FALSE) without averaging PCR

702 replicates. The  $\log_{10}$  (p-value) of comparisons is shown in the heatmap. The comparisons are

703 Negative asymptomatic vs Positive symptomatic (NA-PS), Negative symptomatic vs Positive

704 symptomatic (NS-PS), Positive asymptomatic vs Positive symptomatic (PA-PS). \* $P < 0.05$ ;

705 \*\*P < 0.01; \*\*\*P < 0.001; \*\*\*\*P < 0.0001; ns – not significant. **C)** log<sub>2</sub> Fold-change values  
706 are grouped based on age groups 30-40, 41-50, and 51-60. Each row represents the average of  
707 log<sub>2</sub> Fold-change values for patients falling into the particular age group and respective disease  
708 status. **D)** log<sub>2</sub> Fold-change values are grouped according to sex. Each row represents the  
709 average of log<sub>2</sub> Fold-change values for patients falling into the particular sex and respective  
710 disease status.

711



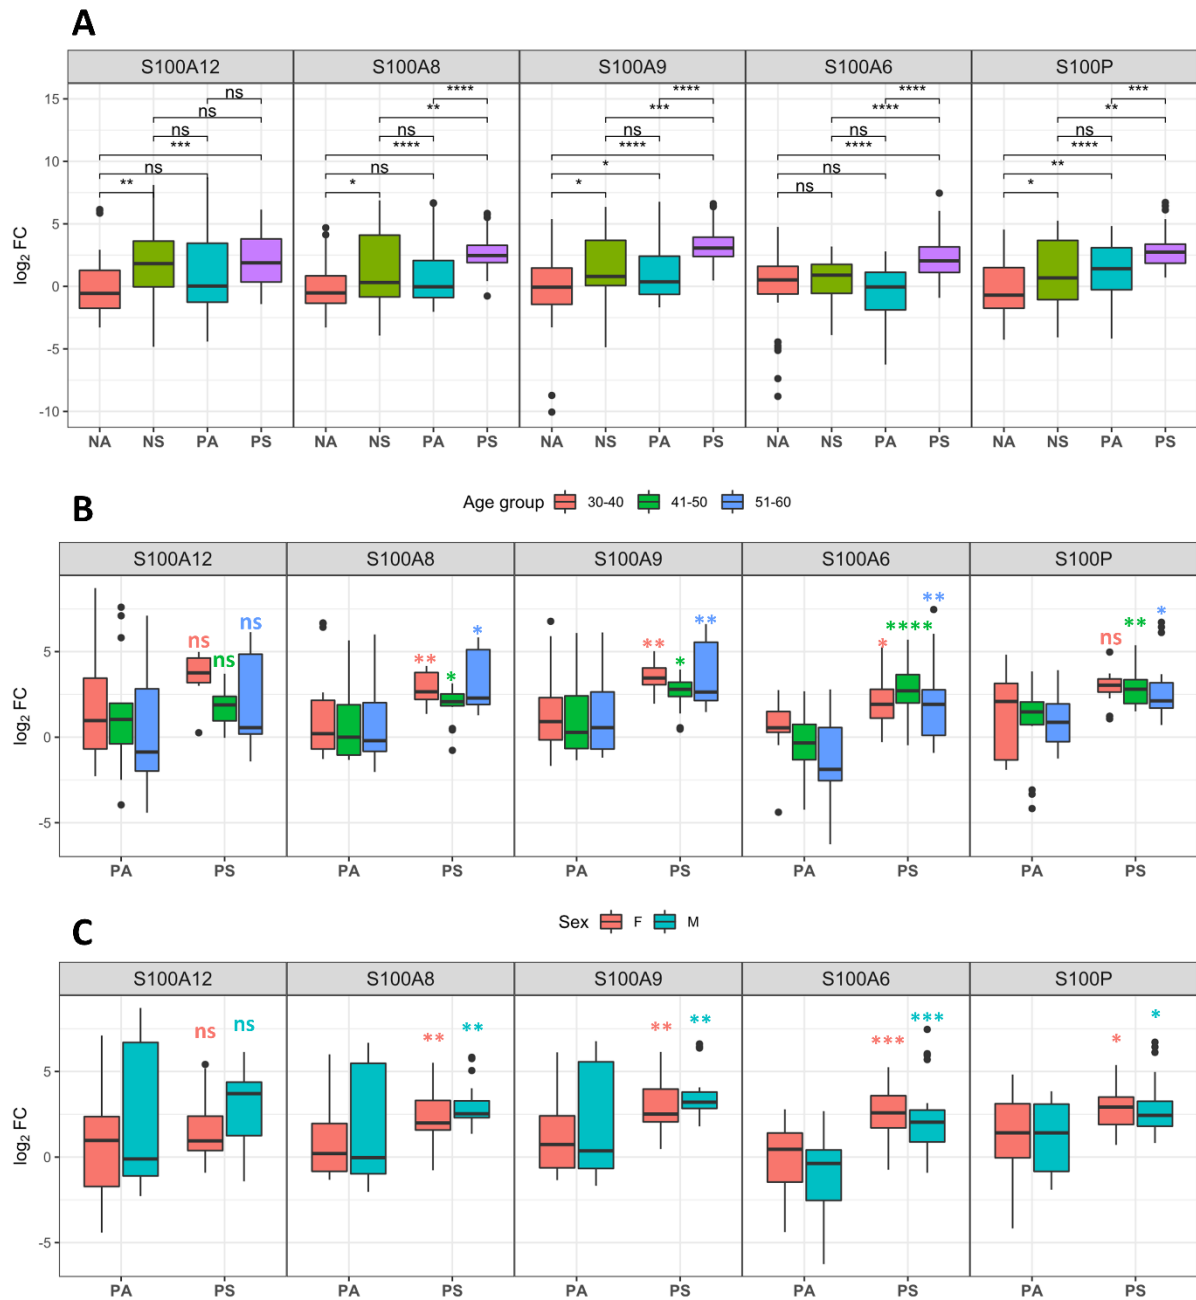

712

713 **Figure 4: Expression profile of the S100 family of genes in different categories of COVID-**  
 714 **19 cohort. A)**  $\log_2$  Fold-change values are plotted as box plots for the S100 family of genes  
 715 for patients who are Negative asymptomatic (NA), Negative symptomatic (NS), Positive  
 716 asymptomatic (PA), and Positive symptomatic (PS) without averaging PCR replicates. **B)** Age-  
 717 wise and **C)** Sex-wise differences in gene expression among Positive asymptomatic (PA) and  
 718 Positive symptomatic (PS) patients were plotted with the significance of the comparison  
 719 between groups shown on the corresponding box. Differences between groups for each gene

720 were computed using the Mann-Whitney rank-sum test (paired = FALSE). \*P < 0.05; \*\*P <  
721 0.01; \*\*\*P < 0.001; \*\*\*\*P < 0.0001; ns – not significant.

722

| Patient Status        | Number of patients | Average age | Number of males | Number of females | Number in the age group 30-40 | Number in the age group 41-50 | Number in the age group 51-60 |
|-----------------------|--------------------|-------------|-----------------|-------------------|-------------------------------|-------------------------------|-------------------------------|
| Negative Asymptomatic | 16                 | 43.9        | 8               | 8                 | 5                             | 6                             | 5                             |
| Negative Symptomatic  | 16                 | 41.7        | 12              | 4                 | 9                             | 4                             | 3                             |
| Positive Asymptomatic | 15                 | 44.3        | 8               | 8                 | 6                             | 6                             | 4                             |
| Positive Symptomatic  | 16                 | 45          | 8               | 8                 | 5                             | 5                             | 6                             |

723

724 **Table 1: Summary of individual and different categories in the COVID-19 cohort used**  
725 **for RT-qPCR based validation analysis.** All samples were collected from Bangalore Urban  
726 area for diagnostic purposes.
